# Supplementary material for: Gaussian-Linearized Transformer with Tranquilized Time-Series Decomposition Methods for Fault Diagnosis and Forecasting of Methane Gas Sensor Arrays
Source: MDPI journal article supplement (doi:10.3390/app14010218), 2023-12-26
Supplement: s1 [file s1]

Archive with 1 entries (1 files):
- applsci-2685980-supplementary.pdf
